# Supplementary material for: Shaping of a three-dimensional carnivorous trap through modulation of a planar growth mechanism
Source: PLoS Biol. 2019 Oct 10;17(10):e3000427. doi: 10.1371/journal.pbio.3000427 (PMC6786542; doi:10.1371/journal.pbio.3000427)
Supplement: S3 Data — Trap growth rate source data file used to make the charts shown in Fig 3J–3L. (XLSX) [file pbio.3000427.s036.xlsx]

## Sheet: SourceData
Name	DAI	HAI	Trap length (mm)	ln Trap Length	Stalk width (mm)	ln Stalk width	Ventral midline length (mm)	ln Ventral midline	Ventral midline as fraction of circumference	Dorsal midline length (mm)	ln Dorsal midline Length	Dorsal midline as fraction of circumference	Mouth (distance between yellow and red landmarks, mm)	ln Mouth	Mouth as fraction of circumference	Trap Width (mm)	ln Trap Width	Trap Height (mm)	ln Height	Circumference planar stalk (mm)	ln Sagittal circumference	Cell number dorsal midline	Cell number ventral midline	Cell number stalk plane	Cell number sum sagittal circumference	Frontal Circumference	ln Frontal circumference	Frontal Cell number in circumference	Transverse Circumference	ln TransverseCircumference	Cell number in circumference	Ventral midline thickness	ln Ventral midline thickness	Ventral midline thickness Cells	Ln thickness cells VM	Dorsalmidline thickness	ln Dorsal midline thickness	Dorsal midline thickness cells	ln thickness cells DM
WT80	3.78883	90.932	47.8	3.86703	39.5	3.6763	18.1	2.89591	0.0957672	108	4.68213	0.571429	12	2.48491	0.0634921	57.3	4.0483	60.3	4.09933	189	5.24175	17	6	6	29	199	5.2933	25	167	5.11799	27					26.7	3.28466	3	1.09861
FS020216_1-2	3.84155	92.1971	48.9	3.88978	25.6	3.24259	19.7	2.98062	0.10051	140	4.94164	0.714286	6	1.79176	0.0306122	61.9	4.12552	68.4	4.09933	196	5.27811	26	8	7	41	190	5.24702	30	184	5.21494	31
FS020216_1-5	3.851	92.4241	49.1	3.89386	34.3	3.53515	18.8	2.93386	0.0899522	144	4.96981	0.688995	10	2.30259	0.0478469	67.1	4.20618	59.7	4.08933	209	5.34233	20	5	5	30	222	5.40268	29	179	5.18739	33
spirals 220216-2	4.12652	99.0365	55.3	4.01277	34.7	3.54674	20.1	3.00072	0.101515	139	4.85981	0.70202	5	1.60944	0.0252525	62.8	4.13996	59.5	4.08598	198	5.28827					200	5.29832	32	184	5.21494	40
FS150216_1-3	4.15567	99.736	56	4.02535	27.1	3.29953	17.6	2.8679	0.0956522	125	4.82831	0.679348	12	2.48491	0.0652174	73.3	4.29456	61.6	4.12066	184	5.21494					238	5.47227	26	214	5.36598	34
FS010216_3-2	4.28442	102.826	59.2	4.08092	41.6	3.7281	18.1	2.89591	0.0707031	163	5.09375	0.636719	12	2.48491	0.046875	69.4	4.23989	68.6	4.22829	256	5.54518	25	8	5	38	220	5.39363	36	204	5.31812	33
ExpID2822_23B\bladder_1	4.55384	109.292	66.5	4.1972	23.5	3.157	14.7	2.68785	0.0731707	161	5.0814	0.785366	6	1.79176	0.0292683	81.5	4.4006	66.2	4.19268	205	5.32301					236	5.46383		220	5.39363	45
FS020216_1-4	4.58498	110.04	67.4	4.21065	51.7	3.94546	22.2	3.10009	0.0932203	149	5.00395	0.631356	8	2.07944	0.0338983	73	4.29046	67.9	4.21804	236	5.46383	22	5	6	33	225	5.4161	33	224	5.41165	42	27.5	3.31419	3	1.09861	26	3.2581	3	1.09861
PI small bladder 3 010316	4.64605	111.505	69.2	4.237	36.1	3.58629	21	3.04452	0.0967742	148	4.99721	0.682028	11	2.3979	0.0506912	75.1	4.31882	65.1	4.17592	217	5.3799					228	5.42935	37	236	5.46383	49
spirals 050316	4.73795	113.711	72	4.27667	42.1	3.74005	18.6	2.92316	0.0766129	162	5.0876	0.653226	20	2.99573	0.0806452	87.4	4.4705	72.6	4.28496	248	5.51343					265	5.57973		272	5.6058	47
ExpID2827_1A_190112	4.89952	117.588	77.2	4.3464	30.9	3.43076	17.9	2.8848	0.0740741	197	5.2832	0.8107	5	1.60944	0.0205761	100	4.60517	76	4.33073	243	5.49306					276	5.6204	51	257	5.54908	n/a
WT160	4.93526	118.446	78.4	4.36182	37.7	3.62966	33.5	3.51155	0.124542	181	5.1985	0.663004	18	2.89037	0.0659341	93.1	4.53367	88.5	4.483	273	5.60947					284	5.64897	42	278	5.62762	44
FS110216_1-1	4.99074	119.778	80.3	4.38577	41.5	3.72569	25.7	3.24649	0.095941	195	5.273	0.719557	13	2.56495	0.0479705	84.8	4.4403	81.3	4.39815	271	5.60212	30	7	5	42	260	5.56068	36	248	5.51343	n/a
PI small bladder 2 010316	5.09511	122.283	84	4.43082	37.8	3.63231	19.1	2.94969	0.0639731	217	5.3799	0.73064	6	1.79176	0.020202	107	4.67283	90.8	4.50866	297	5.69373	36	8	6	50	307	5.72685	49	296	5.69036	52
Spirals190216	5.25496	126.119	90	4.49981	53.9	3.98713	32.6	3.48431	0.100304	230	5.43808	0.699088	15	2.70805	0.0455927	126	4.83628	106	4.66344	329	5.79606	36	7	6		361	5.88888	53	327	5.78996	45
WT115	5.35572	128.537	94	4.54329	60	4.09434	40.6	3.70377	0.119883	222	5.40268	0.649123	20	2.99573	0.0584795	95.1	4.55493	94.5	4.5486	342	5.83481	33	11	6	50	301	5.70711	35
WT126-2	5.41173	129.881	96.3	4.56747	55.5	4.01638	38.5	3.65066	0.115727	228	5.42935	0.676558	20	2.99573	0.0593472	111	4.70953	104	4.64439	337	5.82008	38	9	6	53	356	5.87493	46	361	5.88888	57	27.2	3.30322	3	1.09861	31.2	3.44042	3	1.09861
FS150216_1-2	5.4428	130.627	97.6	4.58088	87.1	4.46706	30.1	3.40453	0.0696056	305	5.72031	0.707657	8	2.07944	0.0185615	176	5.17048	104	4.64439	431	6.06611	48	6	7	61	474	6.16121		496	6.20658
Spirals190216	5.25496	126.119	114	4.7362	44	3.78419	31	3.43399	0.0763547	297	5.69373	0.731527	25	3.21888	0.0615764			105	4.65396	406	6.00635	53	8	6	67	374	5.92426	48	464	6.13988	58
WT123	5.8229	139.75	115	4.74493	63.1	4.14472	44.1	3.78646	0.0952381	333	5.80814	0.720779	11	2.3979	0.0238095	148	4.99721	122	4.80402	462	6.13556	48	7	7	62	423	6.04737	60	455	6.1203	57
PI_imaged_4-2-16	5.88257	141.182	118	4.77068	52.2	3.95508	37.6	3.627	0.0785124	384	5.95064	0.793388	14	2.63906	0.0289256	144	4.96981	116	4.75359	484	6.18208	50	9	5	64	412	6.02102	59	453	6.11589	66
WT151	5.92151	142.116	120	4.78749			45	3.80666	0.100223	374	5.92426	0.835189	14	2.63906	0.0311804	152	5.02388	128	4.85203	449	6.10702	44	9	7	60	433	6.07074	65	455	6.1203	55
PI_bladder_2_29-1-16	6.26206	150.289	139	4.93447	52.2	3.95508	56.5	4.03424	0.0948419	485	6.18415	0.806988	24	3.17805	0.0399334	165	5.10595	187	5.23111	601	6.39859	60	14	7	81	482	6.17794	67	558	6.32436	87	30.8	3.42751	4	1.38629	33.4	3.50856	3	1.09861
PI_imaged_1-3-16_bl8_small	6.34394	152.255	144	4.96981	54.9	4.00551	52.6	3.96272	0.0913793	434	6.07304	0.748276	22	3.09104	0.037931			139	4.93447	580	6.36303	56	11	7	74
WT150	6.43852	154.525	150	5.01064	77.4	4.34899	52.7	3.96462	0.0958409	404	6.00141	0.730561	15	2.70805	0.0271248	157	5.05625	150	5.01064	553	6.31536	51	14	7	72	522	6.25767	67	523	6.25958	71
PI_bladder_6_29-1-16	6.67335	160.16	166	5.11199	75.6	4.32546	44.4	3.79324	0.0694006	482	6.17794	0.760252	22	3.09104	0.0347003	172	5.14749	167	5.11799	634	6.45205	67	15	9	91	529	6.27099	74				34.1	3.5293	4	1.38629	37.1	3.61362	4	1.38629
2974	7.09346	170.243	199	5.2933	89	4.48864	55.2	4.01096	0.066586	645	6.46925	0.780872	39	3.66356	0.0472155	205	5.32301	228	5.42935	826	6.71659					732	6.59578		739	6.6053
medium bladder for mgx-1	7.12813	171.075	202	5.30827	72	4.27667	65	4.17439	0.0902778	542	6.29527	0.752778	17	2.83321	0.0236111	181	5.1985	217	5.3799	720	6.57925	59	14	7	80	581	6.36475	72	670	6.50728	71
PI_bladder_3_29-1-16	7.18478	172.435	207	5.33272	64.5	4.16667	72.9	4.28909	0.0943152	662	6.49527	0.855297	30	3.4012	0.0387597	206	5.32788	193	5.26269	774	6.65157	73	20	7	72	601	6.39859	72	747	6.61607	86	34.2	3.53223	5	1.60944	35.6	3.57235	4	1.38629
PI_bladder_1_29-1-16b	7.22912	173.499	211	5.35186	70	4.2485	70.5	4.25561	0.084323	617	6.42487	0.732779	14	2.63906	0.0166271	215	5.37064	155	5.04343	842	6.73578	64	14	6	84	629	6.44413	60	769	6.64509	82
2976	7.35728	176.575	223	5.40717	99.1	4.59613	78.4	4.36182	0.0898618	690	6.53669	0.794931	32	3.46574	0.0368664	225	5.4161	234	5.45532	868	6.76619			7		677	6.51767		743	6.6107
2982	7.58471	182.033	246	5.50533	84.1	4.43201	110	4.70048	0.120087	755	6.62672	0.824236	32	3.46574	0.0349345	212	5.35659	268	5.59099	916	6.82002	62	13	6	81	714	6.57088		773	6.65028		38.6	3.65325	3	1.09861	46.5	3.83945
2975	7.8175	187.62	272	5.6058	85	4.44265	119	4.77912	0.119358	773	6.65028	0.775326	21	3.04452	0.0210632	218	5.3845	288	5.66296	997	6.90475					754	6.62539		818	6.70686
PI_imaged_16-2-16_bl9	8.04452	193.068	300	5.70378	76.7	4.3399	117	4.76217	0.0936	987	6.89467	0.7896	27	3.29584	0.0216	276	5.6204	328	5.79301	1250	7.1309	81	17	6	104	902	6.80461		962	6.86901
PI_imaged_1-3-16_bl8_Big	8.19405	196.657	320	5.76832	93.4	4.53689	109	4.69135	0.090985	1027	6.9344	0.857262	85	4.44265	0.0709516			341	5.83188	1198	7.08841	78	18	7	103	976	6.88346	59
PI_imaged_26-2-16_bl1	8.12049	194.892	310	5.73657	95.9	4.56331	123.7	4.81786	0.101723	928	6.83303	0.76128	31	3.43399	0.0254307			302	5.71043	1219	7.10579	69	18	8	95	835	6.72743					44.9	3.80444	4	1.38629	40.7	3.70623	3	1.09861
2983	8.27935	198.704	332	5.80513	74.1	4.30542	154	5.03695	0.130952	999	6.90675	0.84949	45	3.80666	0.0382653	245	5.50126	381	5.9428	1176	7.06987		14			906	6.80904	66	1038	6.94505	77
2977b	8.28631	198.872	333	5.80814	100	4.60517	130	4.86753	0.113142	858	6.7546	0.746736	37	3.61092	0.0322019	274	5.61313	296	5.69036	1149	7.04665		14	6		868	6.76619		1037	6.94409
WT445	8.77392	210.574	411	6.01859					0.0918429			0.789124	22	3.09104	0.0132931			430	6.06379	1655	7.41156	77	19	7	103	1243	7.12528	74	1471	7.2937	77	63.7	4.15418	3	1.09861	55.6	4.01818	2	0.693147
PI_imaged_3-3-16_bl1	8.75694	210.167	408	6.01127	103	4.63473	152	5.02388		1306	7.17472					326	5.7869	412	6.02102	1150	7.04752	61	15	7	83	966	6.87316	62	1118	7.0193	58
WT522	9.01972	216.473	457	6.12468	81	4.39445	217	5.3799	0.13991	1151	7.04839	0.742102	95	4.55388	0.0612508			389	5.96358	1551	7.34666	64	13			1032	6.93925	62	1198	7.08841	68
2984	9.04494	217.078	462	6.13556	131	4.8752	193	5.26269	0.139956	1037	6.94409	0.751994	22	3.09104	0.0159536	387	5.95842	399	5.98896	1379	7.22911					1233	7.11721		1333	7.19519
WT480	9.09455	218.269	472	6.15698	67	4.20469	222	5.40268	0.165886	1185	7.0775	0.753177	69	4.23411	0.0461538			423	6.04737	1495	7.30988	70	14	7	91	1200	7.09008	66	1226	7.11151	74
WT533	9.10923	218.622	475	6.16331	116	4.75359	248	5.51343	0.0803093	1126	7.02643	0.779893	74	4.30407	0.0440214			472	6.15698	1681	7.42714	74		7		1148	7.04578	72	1246	7.12769	76
2981	9.31895	223.655	520	6.25383	98.8	4.5931	214	5.36598	0.137267	1162	7.0579	0.74535	103	4.63473	0.066068	355	5.87212	407	6.00881	1559	7.3518					1213	7.10085		1372	7.22402		73.5	4.29729	4	1.38629	35.2	3.56105
2893	10.0077	240.184	700	6.55108			336	5.81711	0.171341	1302	7.17166	0.663947	170	5.1358	0.0866905	367	5.90536	532	6.27664	1961	7.58121					1540	7.33954		1691	7.43308
2986	10.0535	241.285	714	6.57088	92.3	4.52504	330	5.79909	0.164016	1463	7.28824	0.727137	189	5.24175	0.0939364	463	6.13773	643	6.46614	2012	7.60688					1728	7.45472		1849	7.5224		70	4.2485	3	1.09861	48.5	3.88156	2	0.693147
3013	249.05	10.3771	821	6.71052	100	4.60517	408	6.01127	0.172662	1720	7.45008	0.727888	204	5.31812	0.0863309	548	6.30628	771	6.64769	2363	7.76769					2029	7.6153		2149	7.67276
2897	249.32	10.3884	825	6.71538	98	4.58497	431	6.06611	0.190455	1541	7.34019	0.680954	217	5.3799	0.0958904	416	6.03069	697	6.54679	2263	7.72445					1847	7.52132		2169	7.68202
2987	252.656	10.5273	876	6.77537	113	4.72739	381	5.9428	0.158091	1730	7.45588	0.717842	206	5.32788	0.0854772	499	6.21261	688	6.53379	2410	7.78738					1814	7.50329		2226	7.70796
2985	255.017	10.6257	914	6.81783	86.6	4.4613	426	6.05444	0.171153	1723	7.45182	0.692246	227	5.42495	0.0912013	465	6.14204	757	6.62936	2489	7.81964		17			1835	7.5148		2228	7.70886		99	4.59512	4	1.38629	65.2	4.17746	2	0.693147
3011	11.0612	265.469	1103	7.00579	129	4.85981	580	6.36303	0.18401	2218	7.70436	0.70368	302	5.71043	0.0958122	545	6.30079	977	6.88449	3152	8.05579					2317	7.74803		2828	7.94733		99.1	4.59613			48.4	3.8795

## Sheet: Fig. 3J Live Images
ID	Time	ln(size)	Equation	ID	Time+157.37	ln(size)	Equation	Bladder length (um)		Average Equation
1-1	0	4.99043	y = 0.0177x + 4.9796	1-1	157.374	4.99043	y = 0.0177x + 2.1893	147		y=0.0179+5.117
	22.5	5.34233			179.874	5.34233		209
	71.5	6.31173			228.874	6.31173		551		When the bladder size is 10um (ln2.3), the time shift should be
	97.0833	6.66185			254.457	6.66185		782		2.3=0.0179x+5.117	x=157.37 hrs
2-1	0	4.99043	y = 0.02x + 4.9141	2-1	157.37	4.99043	y = 0.02x + 1.7703	147
	22.9167	5.2832			180.287	5.2832		197		Shift the time 157.37 hours back for all samples, in other words, we set the time we begin to measure at to 157.37 hours rather than 0 hours
	71.8333	6.31716			229.203	6.31716		554
	97.4167	6.90475			254.787	6.90475		997		Average Equation after time shift
2-2	0	5.01064	y = 0.0184x + 4.9778	2-2	157.374	5.01064	y = 0.0184x +2.0855	150		y=0.0179x+2.2962
	48.9167	5.7869			206.291	5.7869		326
	74.5	6.39859			231.874	6.39859		601		Size (um)	Ln(size)	Time (hours)	Days
	99.0833	6.80461			256.457	6.80461		902		82	4.40672	117.906	4.91275
3-1	0	5.2832	y = 0.0159x + 5.3074	3-1	157.374	5.2832	y = 0.0159x + 2.8007	197		123	4.81218	140.558	5.85657
	23.1667	5.67332			180.541	5.67332		291		185	5.22036	163.361	6.80669
	72	6.55393			229.374	6.55393		702		277	5.62402	185.912	7.74632
	98	6.79571			255.374	6.79571		894		415	6.02828	208.496	8.68733
5-1	0	5.16479	y = 0.017x + 5.1333	5-1	157.37	5.16479	y = 0.017x + 2.4502	175		622	6.43294	231.103	9.62928
	22.7667	5.44242			180.137	5.44242		231		933	6.83841	253.754	10.5731
	72	6.4708			229.37	6.4708		646		1400	7.24423	276.426	11.5178
	98	6.7417			255.37	6.7417		847
7-1	0	5.20949	y = 0.0179x + 5.1878	7-1	157.37	5.20949	y = 0.0179x +2.3715	183
	23.3333	5.53733			180.703	5.53733		254
	72	6.5903			229.37	6.5903		728
	98	6.8742			255.37	6.8742		967
10-1	0	5.18178	y = 0.0183x + 5.2617	10-1	157.37	5.18178	y = 0.0183x + 2.3799	178
	48.8667	6.23048			206.237	6.23048		508
	75	6.80351			232.37	6.80351		901
	100	6.93049			257.37	6.93049		1023
13-1	0	5.09375	y = 0.0182x + 5.1757	13-1	157.37	5.09375	y = 0.0182x + 2.3037	163
	25.6833	5.69373			183.053	5.69373		297
	50	6.13773			207.37	6.13773		463
	74	6.6053			231.37	6.6053		739
	100	6.90475			257.37	6.90475		997
				LinEST
				slope,m	0.0179834	2.28795	intercept,b
				std dev of slope	0.000652967	0.137808	stdev intercept
				R2=ssR/SSt	0.960735	0.14191	stdev of y
				Fisher F	758.508	31	degrees of freedom
				regression ss	15.2751	0.62429	errors
				Trap length 1.8% ± 0.13 h-1 , R2=0.9607
				n= 8 traps
	HAI	DAI	ln length (mm)
	Time+157.37
	157.374	6.55725	4.99043
	179.874	7.49475	5.34233
	228.874	9.53642	6.31173
	254.457	10.6024	6.66185
	157.37	6.55708	4.99043
	180.287	7.51194	5.2832
	229.203	9.55014	6.31716
	254.787	10.6161	6.90475
	157.374	6.55725	5.01064
	206.291	8.59544	5.7869
	231.874	9.66142	6.39859
	256.457	10.6857	6.80461
	157.374	6.55725	5.2832
	180.541	7.52253	5.67332
	229.374	9.55725	6.55393
	255.374	10.6406	6.79571
	157.37	6.55708	5.16479
	180.137	7.50569	5.44242
	229.37	9.55708	6.4708
	255.37	10.6404	6.7417
	157.37	6.55708	5.20949
	180.703	7.52931	5.53733
	229.37	9.55708	6.5903
	255.37	10.6404	6.8742
	157.37	6.55708	5.18178
	206.237	8.59319	6.23048
	232.37	9.68208	6.80351
	257.37	10.7238	6.93049
	157.37	6.55708	5.09375
	183.053	7.62722	5.69373
	207.37	8.64042	6.13773
	231.37	9.64042	6.6053
	257.37	10.7238	6.90475
Interpolation line
Assumed Initiation length length	Ln Assumed Initiation length
10	2.30259

## Sheet: Fig. 3K Perimeters 
Perimeter growth rate calculations (HAI)
Data Name	HAI	ln Sagittal circumference	ln Frontal circumference	ln Transverse circumference
WT80	90.932	5.24175	5.2933	5.11799
FS020216_1-2	92.1971	5.27811	5.24702	5.21494
FS020216_1-5	92.4241	5.34233	5.40268	5.18739												Frontal perimeter LinEST calculation (HAI)
spirals 220216-2	99.0365	5.28827	5.29832	5.21494												Name	HAI	Ln Frontal perimeter
FS150216_1-3	99.736	5.21494	5.47227	5.36598												WT80	90.932	5.2933
FS010216_3-2	102.826	5.54518	5.39363	5.31812												FS020216_1-2	92.1971	5.24702
ExpID2822_23B\bladder_1	109.292	5.32301	5.46383	5.39363												FS020216_1-5	92.4241	5.40268			Transverse perimeter LinEST calculation (HAI)
FS020216_1-4	110.04	5.46383	5.4161	5.41165												spirals 220216-2	99.0365	5.29832			Data Name	HAI	ln Transverse perimeter
PI small bladder 3 010316	111.505	5.3799	5.42935	5.46383												FS150216_1-3	99.736	5.47227			WT80	90.932	5.11799
spirals 050316	113.711	5.51343	5.57973	5.6058												FS010216_3-2	102.826	5.39363			FS020216_1-2	92.1971	5.21494
ExpID2827_1A_190112	117.588	5.49306	5.6204	5.54908												ExpID2822_23B\bladder_1	109.292	5.46383			FS020216_1-5	92.4241	5.18739
WT160	118.446	5.60947	5.64897	5.62762												FS020216_1-4	110.04	5.4161			spirals 220216-2	99.0365	5.21494
FS110216_1-1	119.778	5.60212	5.56068	5.51343												PI small bladder 3 010316	111.505	5.42935			FS150216_1-3	99.736	5.36598
PI small bladder 2 010316	122.283	5.69373	5.72685	5.69036												spirals 050316	113.711	5.57973			FS010216_3-2	102.826	5.31812
Spirals190216	126.119	5.79606	5.88888	5.78996												ExpID2827_1A_190112	117.588	5.6204			ExpID2822_23B\bladder_1	109.292	5.39363
WT115	128.537	5.83481	5.70711													WT160	118.446	5.64897			FS020216_1-4	110.04	5.41165
WT126-2	129.881	5.82008	5.87493	5.88888												FS110216_1-1	119.778	5.56068			PI small bladder 3 010316	111.505	5.46383
FS150216_1-2	130.627	6.06611	6.16121	6.20658												PI small bladder 2 010316	122.283	5.72685			spirals 050316	113.711	5.6058
spirals2_110216	139.264	6.00635	5.92426	6.13988												Spirals190216	126.119	5.88888			ExpID2827_1A_190112	117.588	5.54908
WT123	139.75	6.13556	6.04737	6.1203												WT115	128.537	5.70711			WT160	118.446	5.62762
PI_imaged_4-2-16	141.182	6.18208	6.02102	6.11589												WT126-2	129.881	5.87493			FS110216_1-1	119.778	5.51343
WT151	142.116	6.10702	6.07074	6.1203												FS150216_1-2	130.627	6.16121			PI small bladder 2 010316	122.283	5.69036
PI_bladder_2_29-1-16	150.289	6.39859	6.17794	6.32436												spirals2_110216	139.264	5.92426			Spirals190216	126.119	5.78996
PI_imaged_1-3-16_bl8_small	152.255	6.36303														WT123	139.75	6.04737			WT126-2	129.881	5.88888
WT150	154.525	6.31536	6.25767	6.25958												PI_imaged_4-2-16	141.182	6.02102			FS150216_1-2	130.627	6.20658
PI_bladder_6_29-1-16	160.16	6.45205	6.27099													WT151	142.116	6.07074			spirals2_110216	139.264	6.13988
2974	170.243	6.71659	6.59578	6.6053												PI_bladder_2_29-1-16	150.289	6.17794			WT123	139.75	6.1203
medium bladder for mgx-1	171.075	6.57925	6.36475	6.50728												WT150	154.525	6.25767			PI_imaged_4-2-16	141.182	6.11589
PI_bladder_3_29-1-16	172.435	6.65157	6.39859	6.61607												PI_bladder_6_29-1-16	160.16	6.27099			WT151	142.116	6.1203
PI_bladder_1_29-1-16b	173.499	6.73578	6.44413	6.64509												2974	170.243	6.59578			PI_bladder_2_29-1-16	150.289	6.32436
2976	176.575	6.76619	6.51767	6.6107												medium bladder for mgx-1	171.075	6.36475			WT150	154.525	6.25958
2982	182.033	6.70073	6.3315	6.41999												PI_bladder_3_29-1-16	172.435	6.39859			2974	170.243	6.6053
2975	187.62	6.90475	6.62539	6.70686												PI_bladder_1_29-1-16b	173.499	6.44413			medium bladder for mgx-1	171.075	6.50728
PI_imaged_16-2-16_bl9	193.068	7.1309	6.80461	6.86901												2976	176.575	6.51767			PI_bladder_3_29-1-16	172.435	6.61607
PI_imaged_1-3-16_bl8_Big	196.657	7.08841	6.88346													2982	182.033	6.3315			PI_bladder_1_29-1-16b	173.499	6.64509
PI_imaged_26-2-16_bl1	194.892	7.10579	6.72743													2975	187.62	6.62539			2976	176.575	6.6107
2983	198.704	7.06987	6.80904	6.94505												PI_imaged_16-2-16_bl9	193.068	6.80461			2982	182.033	6.41999
2977b	198.872	7.04665	6.76619	6.94409												PI_imaged_1-3-16_bl8_Big	196.657	6.88346			2975	187.62	6.70686
WT445	210.574	7.28756	6.73815	6.82437												PI_imaged_26-2-16_bl1	194.892	6.72743			PI_imaged_16-2-16_bl9	193.068	6.86901
PI_imaged_3-3-16_bl1	210.167	7.04752	6.87316	7.0193												2983	198.704	6.80904			2983	198.704	6.94505
WT522	216.473	7.30182	6.94698	7.29845												2977b	198.872	6.76619			2977b	198.872	6.94409
2984	217.078	7.22911	7.11721	7.19519												WT445	210.574	6.73815			WT445	210.574	6.82437
WT480	218.269	7.355	6.96035	7.15618												PI_imaged_3-3-16_bl1	210.167	6.87316			PI_imaged_3-3-16_bl1	210.167	7.0193
WT533	218.622	7.42714	7.04578	7.12769												WT522	216.473	6.94698			WT522	216.473	7.29845
2981	223.655	7.36834	7.19293	7.2998												2984	217.078	7.11721			2984	217.078	7.19519
2893	240.184	7.49832	7.09174	7.17778												WT480	218.269	6.96035			WT480	218.269	7.15618
2986	241.285	7.65444	7.51861	7.46623												WT533	218.622	7.04578			WT533	218.622	7.12769
3013	249.05	7.76769	7.6153	7.67276												2981	223.655	7.19293			2981	223.655	7.2998
2897	249.32	7.72445	7.52132	7.68202												2893	240.184	7.09174			2893	240.184	7.17778
2987	252.656	7.84893														2986	241.285	7.51861			2986	241.285	7.46623
2985	255.017	7.81964	7.5148	7.70886												3013	249.05	7.6153			3013	249.05	7.67276
3011	265.469	8.08549	7.68248	7.83518												2897	249.32	7.52132			2897	249.32	7.68202
LinEST Sagittal																2985	255.017	7.5148			2985	255.017	7.70886
slope,m	0.0165081	3.73309	intercept,b													3011	265.469	7.68248			3011	265.469	7.83518
std dev of slope	0.000304668	0.0531221	stdev intercept													LinEST Frontal					LinEST Transverse
R2=ssR/SSt	0.983255	0.110967	stdev of y													slope,m	0.0138836	4.02365	intercept,b		slope,m	0.015253	3.85131	intercept,b
Fisher F	2935.91	50	degrees of freedom													std dev of slope	0.000306345	0.0529519	stdev intercept		std dev of slope	0.00036298	0.0627567	stdev intercept
regression ss	36.152	0.615687	errors													R2=ssR/SSt	0.977164	0.108304	stdev of y		R2=ssR/SSt	0.975688	0.126653	stdev of y
Sagittal 1.65% ± 0.06 h-1																Fisher F	2053.91	48	degrees of freedom		Fisher F	1765.81	44	degrees of freedom
n= 52																regression ss	24.0917	0.563025	errors		regression ss	28.3252	0.7058	errors
Perimeter growth rate calculations (DAI)
Data Name	DAI	ln sagittal	ln frontal	ln transverse
WT80	3.78883	5.24175	5.2933	5.11799
FS020216_1-2	3.84155	5.27811	5.24702	5.21494
FS020216_1-5	3.851	5.34233	5.40268	5.18739
spirals 220216-2	4.12652	5.28827	5.29832	5.21494
FS150216_1-3	4.15567	5.21494	5.47227	5.36598
FS010216_3-2	4.28442	5.54518	5.39363	5.31812
ExpID2822_23B\bladder_1	4.55384	5.32301	5.46383	5.39363
FS020216_1-4	4.58498	5.46383	5.4161	5.41165
PI small bladder 3 010316	4.64605	5.3799	5.42935	5.46383
spirals 050316	4.73795	5.51343	5.57973	5.6058
ExpID2827_1A_190112	4.89952	5.49306	5.6204	5.54908
WT160	4.93526	5.60947	5.64897	5.62762
FS110216_1-1	4.99074	5.60212	5.56068	5.51343
PI small bladder 2 010316	5.09511	5.69373	5.72685	5.69036
Spirals190216	5.25496	5.79606	5.88888	5.78996
WT115	5.35572	5.83481	5.70711
WT126-2	5.41173	5.82008	5.87493	5.88888
FS150216_1-2	5.4428	6.06611	6.16121	6.20658
spirals2_110216	5.80267	6.00635	5.92426	6.13988
WT123	5.8229	6.13556	6.04737	6.1203
PI_imaged_4-2-16	5.88257	6.18208	6.02102	6.11589
WT151	5.92151	6.10702	6.07074	6.1203
PI_bladder_2_29-1-16	6.26206	6.39859	6.17794	6.32436
PI_imaged_1-3-16_bl8_small	6.34394	6.36303
WT150	6.43852	6.31536	6.25767	6.25958
PI_bladder_6_29-1-16	6.67335	6.45205	6.27099
2974	7.09346	6.71659	6.59578	6.6053
medium bladder for mgx-1	7.12813	6.57925	6.36475	6.50728
PI_bladder_3_29-1-16	7.18478	6.65157	6.39859	6.61607
PI_bladder_1_29-1-16b	7.22912	6.73578	6.44413	6.64509
2976	7.35728	6.76619	6.51767	6.6107
2982	7.58471	6.70073	6.3315	6.41999
2975	7.8175	6.90475	6.62539	6.70686
PI_imaged_16-2-16_bl9	8.04452	7.1309	6.80461	6.86901
PI_imaged_1-3-16_bl8_Big	8.19405	7.08841	6.88346
PI_imaged_26-2-16_bl1	8.12049	7.10579	6.72743
2983	8.27935	7.06987	6.80904	6.94505
2977b	8.28631	7.04665	6.76619	6.94409
WT445	8.77392	7.28756	6.73815	6.82437
PI_imaged_3-3-16_bl1	8.75694	7.04752	6.87316	7.0193
WT522	9.01972	7.30182	6.94698	7.29845
2984	9.04494	7.22911	7.11721	7.19519
WT480	9.09455	7.355	6.96035	7.15618
WT533	9.10923	7.42714	7.04578	7.12769
2981	9.31895	7.36834	7.19293	7.2998
2893	10.0077	7.49832	7.09174	7.17778
2986	10.0535	7.65444	7.51861	7.46623
3013	10.3771	7.76769	7.6153	7.67276
2897	10.3884	7.72445	7.52132	7.68202
2987	10.5273	7.84893
2985	10.6257	7.81964	7.5148	7.70886
3011	11.0612	8.08549	7.68248	7.83518
All charts to same scale for figure.

## Sheet: Fig. 3L Sagittal Regions  
Sagittal regional growth rate calculations (HAI)
Data Name	HAI	ln Ventral midline	ln Dorsal midline Length	ln Stalk
WT80	90.932	2.89591	4.68213	3.6763
FS020216_1-2	92.1971	2.98062	4.94164	3.24259
FS020216_1-5	92.4241	2.93386	4.96981	3.53515
spirals 220216-2	99.0365	3.00072	4.85981	3.54674
FS150216_1-3	99.736	2.8679	4.82831	3.29953
FS010216_3-2	102.826	2.89591	5.09375	3.7281
ExpID2822_23B\bladder_1	109.292	2.68785	5.0814	3.157
FS020216_1-4	110.04	3.10009	5.00395	3.94546
PI small bladder 3 010316	111.505	3.04452	4.99721	3.58629
spirals 050316	113.711	2.92316	5.0876	3.74005
ExpID2827_1A_190112	117.588	2.8848	5.2832	3.43076
WT160	118.446	3.51155	5.1985	3.62966
FS110216_1-1	119.778	3.24649	5.273	3.72569
PI small bladder 2 010316	122.283	2.94969	5.3799	3.63231
Spirals190216	126.119	3.48431	5.43808	3.98713
WT115	128.537	3.70377	5.40268	4.09434
WT126-2	129.881	3.65066	5.42935	4.01638
FS150216_1-2	130.627	3.40453	5.72031	4.46706
spirals2_110216	139.264	3.43399	5.69373	3.78419
WT123	139.75	3.78646	5.80814	4.14472
PI_imaged_4-2-16	141.182	3.627	5.95064	3.95508
WT151	142.116	3.80666	5.92426
PI_bladder_2_29-1-16	150.289	4.03424	6.18415	3.95508
PI_imaged_1-3-16_bl8_small	152.255	3.96272	6.07304	4.00551
WT150	154.525	3.96462	6.00141	4.34899
PI_bladder_6_29-1-16	160.16	3.79324	6.17794	4.32546
2974	170.243	4.01096	6.46925	4.48864
medium bladder for mgx-1	171.075	4.17439	6.29527	4.27667
PI_bladder_3_29-1-16	172.435	4.28909	6.49527	4.16667
PI_bladder_1_29-1-16b	173.499	4.25561	6.42487	4.2485
2976	176.575	4.36182	6.53669	4.59613
2982	182.033	4.70048	6.62672	4.43201
2975	187.62	4.77912	6.65028	4.44265
PI_imaged_16-2-16_bl9	193.068	4.76217	6.89467	4.3399
PI_imaged_1-3-16_bl8_Big	196.657	4.69135	6.9344	4.53689
PI_imaged_26-2-16_bl1	194.892	4.81786	6.83303	4.56331
2983	198.704	5.03695	6.90675	4.30542
2977b	198.872	4.86753	6.7546	4.60517
PI_imaged_3-3-16_bl1	210.167	5.02388	7.17472	4.63473
WT522	216.473	5.3799	7.04839	4.39445
2984	217.078	5.26269	6.94409	4.8752
WT480	218.269	5.40268	7.0775	4.20469
WT533	218.622	5.51343	7.02643	4.75359
2981	223.655	5.36598	7.0579	4.5931
2893	240.184	5.81711	7.17166
2986	241.285	5.79909	7.28824	4.52504
3013	249.05	6.01127	7.45008	4.60517
2897	249.32	6.06611	7.34019	4.58497
2987	252.656	5.9428	7.45588	4.72739
2985	255.017	6.05444	7.45182	4.4613
3011	265.469	6.36303	7.70436	4.85981
Sagittal regional LinEST calculations (HAI)
Data Name	HAI	ln Ventral midline		Data Name	HAI	ln Dorsal midline Length
WT80	90.932	2.89591		WT80	90.932	4.68213
FS020216_1-2	92.1971	2.98062		FS020216_1-2	92.1971	4.94164		Data Name	HAI	ln Stalk
FS020216_1-5	92.4241	2.93386		FS020216_1-5	92.4241	4.96981		WT80	90.932	3.6763
spirals 220216-2	99.0365	3.00072		spirals 220216-2	99.0365	4.85981		FS020216_1-2	92.1971	3.24259
FS150216_1-3	99.736	2.8679		FS150216_1-3	99.736	4.82831		FS020216_1-5	92.4241	3.53515
FS010216_3-2	102.826	2.89591		FS010216_3-2	102.826	5.09375		spirals 220216-2	99.0365	3.54674
ExpID2822_23B\bladder_1	109.292	2.68785		ExpID2822_23B\bladder_1	109.292	5.0814		FS150216_1-3	99.736	3.29953
FS020216_1-4	110.04	3.10009		FS020216_1-4	110.04	5.00395		FS010216_3-2	102.826	3.7281
PI small bladder 3 010316	111.505	3.04452		PI small bladder 3 010316	111.505	4.99721		ExpID2822_23B\bladder_1	109.292	3.157
spirals 050316	113.711	2.92316		spirals 050316	113.711	5.0876		FS020216_1-4	110.04	3.94546
ExpID2827_1A_190112	117.588	2.8848		ExpID2827_1A_190112	117.588	5.2832		PI small bladder 3 010316	111.505	3.58629
WT160	118.446	3.51155		WT160	118.446	5.1985		spirals 050316	113.711	3.74005
FS110216_1-1	119.778	3.24649		FS110216_1-1	119.778	5.273		ExpID2827_1A_190112	117.588	3.43076
PI small bladder 2 010316	122.283	2.94969		PI small bladder 2 010316	122.283	5.3799		WT160	118.446	3.62966
Spirals190216	126.119	3.48431		Spirals190216	126.119	5.43808		FS110216_1-1	119.778	3.72569
WT115	128.537	3.70377		WT115	128.537	5.40268		PI small bladder 2 010316	122.283	3.63231
WT126-2	129.881	3.65066		WT126-2	129.881	5.42935		Spirals190216	126.119	3.98713
FS150216_1-2	130.627	3.40453		FS150216_1-2	130.627	5.72031		WT115	128.537	4.09434
spirals2_110216	139.264	3.43399		spirals2_110216	139.264	5.69373		WT126-2	129.881	4.01638
WT123	139.75	3.78646		WT123	139.75	5.80814		FS150216_1-2	130.627	4.46706
PI_imaged_4-2-16	141.182	3.627		PI_imaged_4-2-16	141.182	5.95064		spirals2_110216	139.264	3.78419
WT151	142.116	3.80666		WT151	142.116	5.92426		WT123	139.75	4.14472
PI_bladder_2_29-1-16	150.289	4.03424		PI_bladder_2_29-1-16	150.289	6.18415		PI_imaged_4-2-16	141.182	3.95508
PI_imaged_1-3-16_bl8_small	152.255	3.96272		PI_imaged_1-3-16_bl8_small	152.255	6.07304		PI_bladder_2_29-1-16	150.289	3.95508
WT150	154.525	3.96462		WT150	154.525	6.00141		PI_imaged_1-3-16_bl8_small	152.255	4.00551
PI_bladder_6_29-1-16	160.16	3.79324		PI_bladder_6_29-1-16	160.16	6.17794		WT150	154.525	4.34899
2974	170.243	4.01096		2974	170.243	6.46925		PI_bladder_6_29-1-16	160.16	4.32546
medium bladder for mgx-1	171.075	4.17439		medium bladder for mgx-1	171.075	6.29527		2974	170.243	4.48864
PI_bladder_3_29-1-16	172.435	4.28909		PI_bladder_3_29-1-16	172.435	6.49527		medium bladder for mgx-1	171.075	4.27667
PI_bladder_1_29-1-16b	173.499	4.25561		PI_bladder_1_29-1-16b	173.499	6.42487		PI_bladder_3_29-1-16	172.435	4.16667
2976	176.575	4.36182		2976	176.575	6.53669		PI_bladder_1_29-1-16b	173.499	4.2485
2982	182.033	4.70048		2982	182.033	6.62672		2976	176.575	4.59613
2975	187.62	4.77912		2975	187.62	6.65028		2982	182.033	4.43201
PI_imaged_16-2-16_bl9	193.068	4.76217		PI_imaged_16-2-16_bl9	193.068	6.89467		2975	187.62	4.44265
PI_imaged_1-3-16_bl8_Big	196.657	4.69135		PI_imaged_1-3-16_bl8_Big	196.657	6.9344		PI_imaged_16-2-16_bl9	193.068	4.3399
PI_imaged_26-2-16_bl1	194.892	4.81786		PI_imaged_26-2-16_bl1	194.892	6.83303		PI_imaged_1-3-16_bl8_Big	196.657	4.53689
2983	198.704	5.03695		2983	198.704	6.90675		PI_imaged_26-2-16_bl1	194.892	4.56331
2977b	198.872	4.86753		2977b	198.872	6.7546		2983	198.704	4.30542
PI_imaged_3-3-16_bl1	210.167	5.02388		PI_imaged_3-3-16_bl1	210.167	7.17472		2977b	198.872	4.60517
WT522	216.473	5.3799		WT522	216.473	7.04839		PI_imaged_3-3-16_bl1	210.167	4.63473
2984	217.078	5.26269		2984	217.078	6.94409		WT522	216.473	4.39445
WT480	218.269	5.40268		WT480	218.269	7.0775		2984	217.078	4.8752
WT533	218.622	5.51343		WT533	218.622	7.02643		WT480	218.269	4.20469
2981	223.655	5.36598		2981	223.655	7.0579		WT533	218.622	4.75359
2893	240.184	5.81711		2893	240.184	7.17166		2981	223.655	4.5931
2986	241.285	5.79909		2986	241.285	7.28824		2986	241.285	4.52504
3013	249.05	6.01127		3013	249.05	7.45008		3013	249.05	4.60517
2897	249.32	6.06611		2897	249.32	7.34019		2897	249.32	4.58497
2987	252.656	5.9428		2987	252.656	7.45588		2987	252.656	4.72739
2985	255.017	6.05444		2985	255.017	7.45182		2985	255.017	4.4613
3011	265.469	6.36303		3011	265.469	7.70436		3011	265.469	4.85981
LinEST Ventral				LinEST Dorsal				LinEST Dorsal
slope,m	0.0207468	0.777519	intercept,b	slope,m	0.0170639	3.33353	intercept,b	slope,m	0.00770908	2.87453
std dev of slope	0.000460732	0.0799715	stdev intercept	std dev of slope	0.000455531	0.0790688	stdev intercept	std dev of slope	0.000644613	0.111219			stdev intercept
R2=ssR/SSt	0.976405	0.166574	stdev of y	R2=ssR/SSt	0.966258	0.164694	stdev of y	R2=ssR/SSt	0.752662	0.227531			stdev of y
Fisher F	2027.7	49	degrees of freedom	Fisher F	1403.2	49	degrees of freedom	Fisher F	143.023	47			degrees of freedom
regression ss	56.2624	1.3596	errors	regression ss	38.0604	1.32908	errors	regression ss	7.40439	2.43321			errors
Ventral midline 2.07% ± 0.09 h-1				Dorsal midline 1.71% ± 0.09 h-1				Stalk line line 0.77% ± 0.13 h-1
n= 51				n= 51				n= 49
Sagittal regional growth rate calculations (DAI)
Name	DAI	ln ventral midline	ln dorsal midline	ln stalk diameter
WT80	3.78883	2.89591	4.68213	3.6763
FS020216_1-2	3.84155	2.98062	4.94164	3.24259
FS020216_1-5	3.851	2.93386	4.96981	3.53515
spirals 220216-2	4.12652	3.00072	4.85981	3.54674
FS150216_1-3	4.15567	2.8679	4.82831	3.29953
FS010216_3-2	4.28442	2.89591	5.09375	3.7281
ExpID2822_23B\bladder_1	4.55384	2.68785	5.0814	3.157
FS020216_1-4	4.58498	3.10009	5.00395	3.94546
PI small bladder 3 010316	4.64605	3.04452	4.99721	3.58629
spirals 050316	4.73795	2.92316	5.0876	3.74005
ExpID2827_1A_190112	4.89952	2.8848	5.2832	3.43076
WT160	4.93526	3.51155	5.1985	3.62966
FS110216_1-1	4.99074	3.24649	5.273	3.72569
PI small bladder 2 010316	5.09511	2.94969	5.3799	3.63231
Spirals190216	5.25496	3.48431	5.43808	3.98713
WT115	5.35572	3.70377	5.40268	4.09434
WT126-2	5.41173	3.65066	5.42935	4.01638
FS150216_1-2	5.4428	3.40453	5.72031	4.46706
spirals2_110216	5.80267	3.43399	5.69373	3.78419
WT123	5.8229	3.78646	5.80814	4.14472
PI_imaged_4-2-16	5.88257	3.627	5.95064	3.95508
WT151	5.92151	3.80666	5.92426
PI_bladder_2_29-1-16	6.26206	4.03424	6.18415	3.95508
PI_imaged_1-3-16_bl8_small	6.34394	3.96272	6.07304	4.00551
WT150	6.43852	3.96462	6.00141	4.34899
PI_bladder_6_29-1-16	6.67335	3.79324	6.17794	4.32546
2974	7.09346	4.01096	6.46925	4.48864
medium bladder for mgx-1	7.12813	4.17439	6.29527	4.27667
PI_bladder_3_29-1-16	7.18478	4.28909	6.49527	4.16667
PI_bladder_1_29-1-16b	7.22912	4.25561	6.42487	4.2485
2976	7.35728	4.36182	6.53669	4.59613
2982	7.58471	4.70048	6.62672	4.43201
2975	7.8175	4.77912	6.65028	4.44265
PI_imaged_16-2-16_bl9	8.04452	4.76217	6.89467	4.3399
PI_imaged_1-3-16_bl8_Big	8.19405	4.69135	6.9344	4.53689
PI_imaged_26-2-16_bl1	8.12049	4.81786	6.83303	4.56331
2983	8.27935	5.03695	6.90675	4.30542
2977b	8.28631	4.86753	6.7546	4.60517
PI_imaged_3-3-16_bl1	8.75694	5.02388	7.17472	4.63473
WT522	9.01972	5.3799	7.04839	4.39445
2984	9.04494	5.26269	6.94409	4.8752
WT480	9.09455	5.40268	7.0775	4.20469
WT533	9.10923	5.51343	7.02643	4.75359
2981	9.31895	5.36598	7.0579	4.5931
2893	10.0077	5.81711	7.17166
2986	10.0535	5.79909	7.28824	4.52504
3013	10.3771	6.01127	7.45008	4.60517
2897	10.3884	6.06611	7.34019	4.58497
2987	10.5273	5.9428	7.45588	4.72739
2985	10.6257	6.05444	7.45182	4.4613
3011	11.0612	6.36303	7.70436	4.85981
