# Supplementary material for: Shaping of a three-dimensional carnivorous trap through modulation of a planar growth mechanism
Source: PLoS Biol. 2019 Oct 10;17(10):e3000427. doi: 10.1371/journal.pbio.3000427 (PMC6786542; doi:10.1371/journal.pbio.3000427)
Supplement: S6 Data — Cell area source data file for chart shown in S4 Fig. (XLS) [file pbio.3000427.s039.xls]

## Sheet: Sheet1
Name	Trap length (mm)	Mean Area in Range	N cells in range	DAI	Side views, all or part of trap imaged
wt80um	50.5628	36.1023	220	3.78883	whole trap
wt 126-2	101.866	52.4851	613	5.41173	whole trap
wt123um	121.647	62.0367	1014	5.8229	whole trap
PI_bladder_2_29-1-16	147.034	65.7147	1298	6.26206	whole trap
medium bladder for mgx-1 220316	213.676	92.8482	1384	7.12813	whole trap
Bl26_x25_081116_ID7898_151	135	56.6001	489	6.06422	half traps
B50_x20_side_316	292	133.002	889	7.8517	half traps
B47_x20_side_345	318	135.122	783	8.04933	half traps
B46_x20_side_370	348	155.201	937	8.25821	half traps
Bl25_20x_081116_ID7898_372	408.3	258.769	692	8.62845	half traps
heatshocked_2-2-16_Imaged_day_2_line_16_45_8min_bladder_2_side	420.1	337.066	489	8.69447	half traps
21216_6dahs_B1_side2	453	457.335	501	8.86916	half traps
B45_x20_side_505	517	389.045	704	9.17535	half traps
mCherry_bladders_imaged_03-12-15_HyD_compensation_linear_AOTF_PMT_bladder_3	520.6	567.796	730	9.19143	half traps
181116_5dahs_bl2_side1	606	492.059	674	9.56998	half traps
181116_6dahs_bl4_side1	661.6	753.584	619	9.74675	half traps
Heatshocked_23-6-16_Day_2_line_16_45_6min_x20_zoom_water_1_bladder_4_side	615.9	790.984	554	9.58091	half traps
Heatshock_19-1-16_45C_6min_line_16_bladder_3_side	709	874.753	589	9.90707	half traps
Bl29_x10_081116_ID7898_875um	837.1	807.328	718	10.2919	half traps
0101217_B1_890	861.4	860.044	582	10.3582	half traps
030217_B11-1_20xt_909	866.5	861.882	641	10.3719	half traps
0101217_B2_good_952	875	877.015	716	10.3945	half traps
030217_B9_20xt_957	935	940.657	644	10.5482	half traps
030217_B3_980	929.1	999.547	656	10.5335	half traps
0101217_B6_991	926	944.072	640	10.5257	half traps
0101217_B10_994	937	824.53	765	10.5531	half traps
bladder33_x20Imm_tile2x2_z1_ph1	1310	1902.6	612	11.3295	half traps
Chart
Name	DAI	Mean Area in Range
wt80um	3.78883	36.1023
wt 126-2	5.41173	52.4851
wt123um	5.8229	62.0367
PI_bladder_2_29-1-16	6.26206	65.7147
medium bladder for mgx-1 220316	7.12813	92.8482
Bl26_x25_081116_ID7898_151	6.06422	56.6001
B50_x20_side_316	7.8517	133.002
B47_x20_side_345	8.04933	135.122
B46_x20_side_370	8.25821	155.201
Bl25_20x_081116_ID7898_372	8.62845	258.769
heatshocked_2-2-16_Imaged_day_2_line_16_45_8min_bladder_2_side	8.69447	337.066
21216_6dahs_B1_side2	8.86916	457.335
B45_x20_side_505	9.17535	389.045
mCherry_bladders_imaged_03-12-15_HyD_compensation_linear_AOTF_PMT_bladder_3	9.19143	567.796
181116_5dahs_bl2_side1	9.56998	492.059
181116_6dahs_bl4_side1	9.74675	753.584
Heatshocked_23-6-16_Day_2_line_16_45_6min_x20_zoom_water_1_bladder_4_side	9.58091	790.984
Heatshock_19-1-16_45C_6min_line_16_bladder_3_side	9.90707	874.753
Bl29_x10_081116_ID7898_875um	10.2919	807.328
0101217_B1_890	10.3582	860.044
030217_B11-1_20xt_909	10.3719	861.882
0101217_B2_good_952	10.3945	877.015
030217_B9_20xt_957	10.5482	940.657
030217_B3_980	10.5335	999.547
0101217_B6_991	10.5257	944.072
0101217_B10_994	10.5531	824.53
bladder33_x20Imm_tile2x2_z1_ph1	11.3295	1902.6
