# Supplementary material for: Shaping of a three-dimensional carnivorous trap through modulation of a planar growth mechanism
Source: PLoS Biol. 2019 Oct 10;17(10):e3000427. doi: 10.1371/journal.pbio.3000427 (PMC6786542; doi:10.1371/journal.pbio.3000427)
Supplement: S11 Data — S8C Fig source data file. (XLSX) [file pbio.3000427.s044.xlsx]

## Sheet: S9_Data
0.52695	1.0982	0.57125	0.47983	6	1	62.006	43.931	18.076	1.4115	6	16.32	22.963	6.6435	0.71069	1
0.52469	1.1597	0.63501	0.45243	6	1	48.024	53.426	5.402	0.89889	1	12.46	29.367	16.907	0.42429	1
0.62046	1.019	0.39851	0.60891	6	1	45.621	54.793	9.1717	0.83261	1	14.303	26.725	12.421	0.53521	1
0.6345	0.86491	0.23041	0.7336	6	1	62.416	42.16	20.256	1.4804	6	19.673	17.848	1.8253	1.1023	6
0.68761	1.0442	0.35655	0.65853	6	1	40.575	55.486	14.911	0.73127	1	13.894	27.962	14.068	0.49689	1
0.52154	0.82626	0.30472	0.63121	6	1	55.527	42.13	13.398	1.318	6	14.92	17.035	2.1148	0.87586	1
0.69141	1.027	0.33561	0.67322	6	1	53.173	57.101	3.9285	0.9312	1	18.223	28.194	9.9711	0.64634	1		The histogram is generated from column L minus column M (and ignoring the sign). Columns L and M are the distance between each pair of arms for each quadrifid
0.46635	0.89767	0.43132	0.51951	6	1	49.202	52.438	3.2364	0.93828	1	11.391	22.781	11.39	0.50003	1
0.41036	0.94851	0.53814	0.43264	6	1	52.438	53.895	1.4566	0.97297	1	10.732	25.204	14.471	0.42583	1
0.47357	0.77472	0.30116	0.61127	6	1	52.919	60.603	7.6844	0.8732	1	12.592	23.113	10.521	0.54478	1
0.6013	1.0141	0.4128	0.59294	6	1	59.722	53.439	6.2827	1.1176	6	17.689	25.952	8.2627	0.68161	1
0.64936	1.1879	0.53853	0.54665	6	1	53.62	41.653	11.967	1.2873	6	17.117	23.317	6.1999	0.7341	1
0.67944	1.46	0.78052	0.46538	6	1	60.208	52.114	8.0946	1.1553	6	20.132	35.558	15.426	0.56617	1
0.56085	0.94488	0.38403	0.59357	6	1	62.515	52.911	9.6039	1.1815	6	17.337	24.746	7.4093	0.70059	1
0.53141	1.2436	0.71215	0.42733	6	1	47.629	50.011	2.3822	0.95237	1	12.518	29.997	17.479	0.41732	1
0.52532	1.251	0.72567	0.41993	6	1	55.929	47.77	8.159	1.1708	6	14.676	28.058	13.382	0.52305	1
0.49887	0.85944	0.36057	0.58046	6	1	48.799	64.136	15.337	0.76086	1	13.353	27.326	13.973	0.48865	1
0.92588	0.9288	0.0029202	0.99686	1	6	37.076	47.287	10.211	0.78407	6	16.681	21.465	4.7843	0.77711	6
0.52917	0.86694	0.33778	0.61038	6	1	61.902	48.254	13.648	1.2828	6	16.195	20.395	4.2	0.79407	1
0.49321	0.92043	0.42723	0.53584	6	1	44.547	52.865	8.3186	0.84265	1	11.524	25.021	13.497	0.46057	1
0.14062	0.9078	0.76719	0.1549	6	1	39.925	60.594	20.669	0.65889	1	3.3324	26.593	23.261	0.12531	1
0.68681	0.84627	0.15946	0.81158	6	1	54.137	50.153	3.9841	1.0794	6	18.283	21.518	3.2348	0.84967	1
0.53682	0.97549	0.43868	0.5503	6	1	44.833	49.617	4.7837	0.90359	1	11.939	23.267	11.328	0.51313	1
0.65134	1.114	0.4627	0.58466	6	1	38.815	39.877	1.062	0.97337	1	12.444	21.194	8.7504	0.58713	1
0.77748	1.2215	0.44407	0.63647	6	1	50.332	34.7	15.632	1.4505	6	19.122	19.94	0.81814	0.95897	1
0.5167	1.2489	0.73223	0.41372	6	1	57.64	41.164	16.476	1.4002	6	15.469	24.084	8.6154	0.64228	1
0.73831	0.94922	0.21092	0.7778	6	1	52.311	50.918	1.393	1.0274	6	19.366	23.497	4.1317	0.82416	1
0.77992	0.96848	0.18855	0.80531	6	1	55.135	50.544	4.5905	1.0908	6	20.993	23.708	2.7153	0.88547	1
0.5296	0.85407	0.32447	0.62009	6	1	47.688	55.131	7.4427	0.865	1	12.545	22.851	10.306	0.54898	1
0.48032	0.95778	0.47746	0.50149	6	1	51.414	51.537	0.12339	0.99761	1	12.391	23.79	11.399	0.52084	1
0.62619	0.8855	0.25931	0.70716	6	1	59.392	45.203	14.188	1.3139	6	18.394	19.511	1.1168	0.94276	1
0.67839	0.80314	0.12475	0.84468	6	1	63.865	42.571	21.293	1.5002	6	21.329	17.398	3.9309	1.2259	6
0.60787	0.77971	0.17185	0.7796	6	1	45.578	46.631	1.0527	0.97743	1	13.656	18.234	4.5777	0.74894	1
0.47539	0.64174	0.16634	0.74079	6	1	48.69	49.899	1.2087	0.97578	1	11.626	15.909	4.2832	0.73077	1
0.38988	0.64234	0.25246	0.60697	6	1	54.089	46.606	7.483	1.1606	6	10.541	14.884	4.3435	0.70818	1
0.85655	1.1574	0.30086	0.74006	6	1	46.203	54.307	8.1041	0.85077	1	19.217	29.729	10.511	0.64642	1
0.38809	0.42199	0.033902	0.91966	6	1	53.226	48.307	4.9192	1.1018	6	10.266	10.219	0.046512	1.0046	6
0.43731	1.0727	0.63541	0.40767	6	1	48.375	48.27	0.10572	1.0022	6	10.809	24.948	14.139	0.43325	1
0.41902	0.66267	0.24365	0.63232	6	1	58.724	43.333	15.391	1.3552	6	12.463	14.308	1.8441	0.87111	1
0.46761	1.1762	0.70856	0.39757	6	1	59.745	34.425	25.32	1.7355	6	13.87	19.132	5.2622	0.72495	1
0.38249	0.87826	0.49577	0.43551	6	1	66.725	39.791	26.934	1.6769	6	13.075	16.92	3.8455	0.77272	1
0.41556	0.76328	0.34772	0.54444	6	1	54.995	46.702	8.2932	1.1776	6	12.23	17.408	5.1785	0.70253	1
