# Supplementary material for: Shaping of a three-dimensional carnivorous trap through modulation of a planar growth mechanism
Source: PLoS Biol. 2019 Oct 10;17(10):e3000427. doi: 10.1371/journal.pbio.3000427 (PMC6786542; doi:10.1371/journal.pbio.3000427)
Supplement: S13 Data — S8I Fig source data file. (XLSX) [file pbio.3000427.s046.xlsx]

## Sheet: NewArmLengths_data
0.40029	1.1676	0.76726	0.34285	6	1	58.937	42.148	16.789	1.3983	6	11.913	24.291	12.378	0.49042	1
0.56887	0.64672	0.077848	0.87963	6	1	64.933	60.01	4.9226	1.082	6	18.763	19.95	1.1871	0.9405	1
0.99761	1.159	0.16142	0.86073	6	1	58.103	49.699	8.4046	1.1691	6	28.129	27.844	0.28532	1.0102	6
0.74964	1.3594	0.60977	0.55145	6	1	66.691	53.605	13.086	1.2441	6	24.482	33.94	9.4578	0.72134	1
0.27768	0.7127	0.43502	0.38962	6	1	56.408	56.643	0.23517	0.99585	1	9.1055	21.475	12.369	0.42401	1
0.67249	1.3773	0.7048	0.48827	6	1	69.969	57.694	12.275	1.2128	6	23.099	36.74	13.641	0.62871	1
0.25354	1.3022	1.0486	0.1947	6	1	49.944	50.496	0.5529	0.98905	1	6.6641	30.638	23.974	0.21751	1
0.48802	0.83235	0.34433	0.58631	6	1	32.476	55.719	23.243	0.58285	1	8.4781	23.762	15.284	0.35679	1
0.71221	0.75581	0.043605	0.94231	6	1	44.214	51.655	7.4408	0.85595	1	15.568	19.53	3.9623	0.79712	1
0.44178	0.74363	0.30186	0.59408	6	1	44.017	54.385	10.368	0.80935	1	9.6789	19.798	10.119	0.48887	1
0.47427	0.74228	0.26801	0.63894	6	1	43.926	59.667	15.74	0.73619	1	10.617	21.942	11.325	0.48385	1
0.59038	0.90186	0.31148	0.65462	6	1	62.339	42.062	20.277	1.4821	6	18.259	18.559	0.3	0.98383	1		The histogram is generated from column L minus column M (and ignoring the sign). Columns L and M are the distance between each pair of arms for each quadrifid
0.29957	0.55101	0.25145	0.54367	6	1	58.906	54.939	3.9677	1.0722	6	8.848	15.541	6.6928	0.56934	1
0.47341	1.0655	0.59206	0.44432	6	1	59.592	35.306	24.286	1.6879	6	14.36	17.942	3.5811	0.8004	1
0.36954	1.0055	0.63593	0.36753	6	1	45.205	54.848	9.6433	0.82418	1	8.889	26.442	17.553	0.33617	1
0.56043	0.66493	0.1045	0.84284	6	1	55.285	52.127	3.1577	1.0606	6	15.318	17.03	1.7112	0.89952	1
0.94494	1.0255	0.080599	0.92141	6	1	64.437	43.556	20.881	1.4794	6	29.384	21.472	7.9114	1.3684	6
0.47293	1.0246	0.55162	0.4616	6	1	69.835	42.39	27.445	1.6474	6	16.841	21.015	4.1738	0.80139	1
0.37096	1.1495	0.77855	0.32271	6	1	45.275	35.447	9.8279	1.2773	6	8.5924	19.478	10.886	0.44113	1
0.2357	1.0198	0.78414	0.23111	6	1	50.674	48.944	1.7297	1.0353	6	6.1844	23.991	17.807	0.25778	1
0.59713	1.3772	0.78008	0.43358	6	1	60.468	54.991	5.4771	1.0996	6	18.015	35.001	16.987	0.51468	1
0.475	0.79343	0.31843	0.59867	6	1	49.131	50.974	1.8434	0.96384	1	12.022	21.432	9.4097	0.56094	1
0.63426	0.75338	0.11912	0.84189	6	1	66.726	53.577	13.149	1.2454	6	21.089	20.051	1.0375	1.0517	6
0.56924	0.62977	0.060522	0.9039	6	1	49.769	60.298	10.529	0.82539	1	14.276	21.976	7.7	0.64962	1
0.38393	1.0202	0.6363	0.37632	6	1	68.821	52.468	16.353	1.3117	6	13.705	25.722	12.017	0.53281	1
0.50185	0.94946	0.44762	0.52856	6	1	53.627	44.423	9.2046	1.2072	6	13.529	21.056	7.5268	0.64254	1
0.68977	1.0614	0.37161	0.64988	6	1	39.296	35.437	3.859	1.1089	6	13.534	17.944	4.4101	0.75424	1
0.52365	0.74196	0.21831	0.70576	6	1	83.296	51.096	32.2	1.6302	6	23.034	18.664	4.3698	1.2341	6
0.83987	1.146	0.30614	0.73286	6	1	64.105	40.75	23.355	1.5731	6	26.239	22.162	4.0763	1.1839	6
0.50636	0.77428	0.26792	0.65397	6	1	58.238	48.319	9.9191	1.2053	6	16.194	18.321	2.1275	0.88388	1
0.41503	0.99303	0.578	0.41794	6	1	55.1	47.729	7.3717	1.1545	6	12.515	22.988	10.473	0.5444	1
0.48316	0.82173	0.33857	0.58798	6	1	41.921	45.781	3.8605	0.91568	1	10.374	18.461	8.0869	0.56194	1
0.44738	1.0633	0.61592	0.42074	6	1	46.7	35.172	11.528	1.3278	6	10.548	17.842	7.2935	0.59121	1
0.41065	0.90021	0.48956	0.45617	6	1	47.43	48.235	0.80529	0.98331	1	9.7029	21.007	11.304	0.46189	1
0.73078	0.92353	0.19275	0.79129	6	1	52.828	51.384	1.4441	1.0281	6	19.604	22.992	3.3877	0.85265	1
0.20234	1.9449	1.7425	0.10404	6	1	53.69	42.113	11.577	1.2749	6	5.8054	34.854	29.048	0.16656	1
0.80424	1.0535	0.24926	0.7634	1	6	46.779	35.427	11.352	1.3204	1	18.328	17.917	0.41187	1.023	1
0.12672	1.6531	1.5263	0.076656	6	1	66.188	38.454	27.733	1.7212	6	4.4823	28.373	23.891	0.15798	1
